1 DIVERSITY AND GENE EXPRESSION PATTERNS OF FUNCTIONAL GROUPS IN  
2 SIDESTREAM AND MAINSTREAM WASTEWATER PARTIAL-NITRITATION ANAMMOX  
3 BIOFILMS

4 Carolina Suarez<sup>1\*</sup>, David Gustavsson<sup>2,3</sup>, Malte Hermansson<sup>1</sup>, Frank Persson<sup>4</sup>

5

6 <sup>1</sup>Department of Chemistry and Molecular Biology, University of Gothenburg, SE-40530 Gothenburg,  
7 Sweden.

8 <sup>2</sup>VA SYD, P.O. Box 191, SE-20121 Malmö, Sweden.

9 <sup>3</sup>Sweden Water Research, c/o Ideon Science Park, Scheelevägen 15, SE-22370 Lund, Sweden.

10 <sup>4</sup>Division of Water Environment Technology, Department of Architecture and Civil Engineering,  
11 Chalmers University of Technology, SE-41296 Gothenburg, Sweden.

12 \*Corresponding author: Department of Chemistry and Molecular Biology, University of Gothenburg,  
13 SE-40530 Gothenburg, Sweden; e-mail: carolina.suarez@cmb.gu.se

14

15 Keywords: anammox, biofilms, WWTP, microdiversity, ribosomes

16

17 **Abstract**

18 Partial nitrification-anammox (PNA) is today used for nitrogen removal from highly concentrated  
19 wastewater after anaerobic sludge digestion (sidestream). However, implementation of PNA for  
20 treatment of municipal wastewater (mainstream), with its lower ammonium concentration and lower  
21 temperature is challenging, which might be due to differences in microbial community composition  
22 and/or activity. To investigate this, we compared side-by-side sidestream and mainstream PNA  
23 biofilms using amplicon sequencing of 16S rDNA and rRNA, *hzsB* DNA and mRNA, and the genes  
24 *nxB*, and *amoA*. The two communities were different to each other with relatively more heterotrophic

25 denitrifying bacteria and less anammox bacteria in the mainstream. With *hzsB* and *nxrB* we found  
26 microdiversity among *Brocadia* and *Nitrospira*, and turnover (taxa replacement) between sidestream  
27 and mainstream. However, in both environments *Brocadia sapporoensis* represented most of the *hzsB*  
28 DNA and mRNA reads, despite the different environmental conditions and nitrogen removal rates. All  
29 of those populations present in both sidestream and mainstream had no differences in their 16S  
30 rRNA:rDNA ratios, supporting recent findings that rRNA:rDNA ratios are poor indicators of bacterial  
31 activity. The observed diversity within functional groups and composition differences between  
32 sidestream and mainstream add complexity to our view of PNA communities with possible  
33 implication for reactor function.

34

## 35 **Introduction**

36 Excess of reactive nitrogen in the environment contributes to eutrophication (Erisman, *et al.* 2015). To  
37 reduce reactive nitrogen discharges into water bodies, removal of nitrogen in wastewater treatment  
38 plants (WWTPs) is essential. Biological nitrogen removal from the sidestream of wastewater, i.e.  
39 reject water, from dewatering of anaerobic digested sludge, with high ammonium concentration and  
40 high temperature, can be achieved by the partial nitrification-anammox (PNA) process (Lackner, *et al.*  
41 2014). PNA combines oxidation of part of the wastewater ammonium to nitrite by ammonia oxidising  
42 bacteria (AOB) and a subsequent conversion of the nitrite and remaining ammonium to nitrogen gas  
43 by anammox bacteria (AMX). PNA communities are often grown in biofilms in granule reactors or in  
44 moving bed biofilm reactors (MBBRs) to maintain the slow growing AMX at high concentrations in  
45 the reactors (Agrawal, *et al.* 2017).

46

47 Implementation of PNA for the colder, more diluted mainstream of wastewater, which contains the  
48 majority of the nitrogen at WWTPs, has been challenging. Low nitrogen removal rates and high  $\text{NO}_3^-$   
49 production are commonly reported (Gonzalez-Martinez, *et al.* 2016, Gustavsson, *et al.* 2020, Lotti, *et*  
50 *al.* 2014, Wu, *et al.* 2016). From a population ecology perspective, multiple scenarios exist to explain

51 the differences in removal rates and nitrate production between sidestream and mainstream PNA.  
52 First, the lower substrate concentration and the lower temperature in the mainstream will inevitably  
53 result in lower removal rates. Second, some taxa could differ in their metabolic activity in the two  
54 environments. For example, high nitrate production by nitrite oxidising bacteria (NOB) is often  
55 reported in mainstream PNA (Cao, *et al.* 2017). Third, functional groups might differ in abundance,  
56 which in turn could influence ecosystem function. When gradually replacing sidestream with  
57 mainstream wastewater a decrease in AMX and AOB abundances was observed by Yang, *et al.*  
58 (2018). Fourth, diversity in the accessory genome within bacterial species exist (McInerney, *et al.*  
59 2017). A mechanism explaining microdiversity is that sub-populations have different ecological  
60 niches, i.e. are ecotypes (Moore, *et al.* 1998). It is possible that differences within the main functional  
61 groups in sidestream and mainstream PNA could occur. For instance, cold tolerant strains with an  
62 oligotrophic lifestyle might be observed in mainstream, while sidestream conditions might favour  
63 eutrophic lifestyles.

64

65 Amplicon sequencing of the 16S gene (rDNA) has recently been employed to investigate the effect of  
66 various operational conditions in PNA systems, and to describe community composition (Agrawal, *et*  
67 *al.* 2017, Laurenzi, *et al.* 2016, Persson, *et al.* 2017, Yang, *et al.* 2018). Sequencing of rDNA offers  
68 limited resolution to infer closely related populations, but the use of amplicon sequences variants  
69 (ASVs) (Callahan, *et al.* 2017) instead of operational taxonomic units (OTUs) would allow potential  
70 ecotypes to be elucidated (García-García, *et al.* 2019). Even higher resolution within taxonomic  
71 groups could be achieved by sequencing of functional genes, like *hzsB* for anammox bacteria (Wang,  
72 *et al.* 2012), *amoA* for AOB (Rotthauwe, *et al.* 1997), and *nxB* for NOB (Pester, *et al.* 2013), but this  
73 approach is rarely used for describing the PNA communities.

74

75 Community composition can be described with amplicon sequencing, but bacteria can be active,  
76 growing, dormant or deceased (Blazewicz, *et al.* 2013), and their metabolic status cannot be

77 determined from gene sequencing alone. An alternative is sequencing of 16S rRNA (rRNA), as  
78 bacterial growth has been associated with an increase in ribosome production, at least for  
79 *Proteobacteria* (Kerkhof and Kemp 1999, Schaechter, *et al.* 1958), and ribosomal degradation is seen  
80 for some bacteria during starvation (Deutscher 2003). Thus, estimations of rRNA:rDNA ratios have  
81 been considered a measure of activity in the total community (Campbell, *et al.* 2011, Jones and  
82 Lennon 2010). However, this metric is not universal, as there are exceptions to the link between  
83 rRNA content and activity in bacteria (Blazewicz, *et al.* 2013).

84

85 In this study, we operated pilot-scale MBBRs for PNA, fed with either pre-treated municipal  
86 wastewater (mainstream) or sludge liquor from anaerobic sludge digesters (sidestream) from the  
87 Sjölanda WWTP, Malmö, Sweden. The aim of this study was to determine, by high throughput  
88 amplicon sequencing of rDNA, if different microbial communities and/or taxa abundance were  
89 established in the mainstream and sidestream. We also asked if multiple AMX, NOB and AOB  
90 populations coexisted in the two environments. To address this question, we sequenced the functional  
91 genes *hzsB*, *nxB* and *amoA*, as well as *hzsB* mRNA from the biofilm on individual mainstream and  
92 sidestream carriers. Furthermore, we measured rRNA:rDNA ratios to test our hypothesis that the  
93 rRNA:rDNA ratios of bacterial groups present in both environments would vary due to the different  
94 conditions, which would provide insights about the response in activity of specific taxa.

95

## 96 **Materials and Methods**

97 The sidestream and mainstream pilot MBBRs were located at the Sjölanda WWTP, Malmö, Sweden  
98 (Hanner, *et al.* 2003), see Table 1 for operational data. They were filled to 40% with K1<sup>®</sup> carriers  
99 (Veolia Water Technologies AB – AnoxKaldnes, Lund, Sweden). The MBBRs are described in detail  
100 elsewhere (Gustavsson, *et al.* 2020). To promote anammox growth in the mainstream MBBR, biofilm  
101 carriers were frequently exchanged between the sidestream and mainstream MBBRs. However,  
102 biofilm carriers sampled in this study were not exchanged, but kept isolated in each reactor in

103 cylindrical cages (immersed volume 2.5 L) for 128 days until sampling. A steel mesh bottom in the  
104 cages allowed water circulation. The cages were filled using carries taken from their respective  
105 MBBRs.

106 **Table 1:** Operational data of the pilot reactors from 15 September 2015 to 14 October 2015. Mean  
107 values +/- S.D.

|                                                               | Sidestream  | Mainstream  |
|---------------------------------------------------------------|-------------|-------------|
| Influent NH <sub>4</sub> <sup>+</sup> (mg N L <sup>-1</sup> ) | 880 ± 48    | 26 ± 5.0    |
| Effluent NH <sub>4</sub> <sup>+</sup> (mg N L <sup>-1</sup> ) | 55 ± 12     | 21 ± 4.6    |
| Effluent NO <sub>2</sub> <sup>-</sup> (mg N L <sup>-1</sup> ) | 6.1 ± 2.1   | 0.25 ± 0.52 |
| Effluent NO <sub>3</sub> <sup>-</sup> (mg N L <sup>-1</sup> ) | 120 ± 13    | 1.7 ± 1.3   |
| Ammonium loading rate (g N m <sup>-2</sup> d <sup>-1</sup> )  | 1.8 ± 0.25  | 0.78 ± 0.14 |
| Nitrogen removal rate (g N m <sup>-2</sup> d <sup>-1</sup> )  | 1.5 ± 0.19  | 0.13 ± 0.12 |
| DO (mg L <sup>-1</sup> )                                      | 1.0 ± 0.24  | 1.0 ± 0.15  |
| T (°C)                                                        | 28.3 ± 0.80 | 19.1 ± 0.65 |

108

### 109 **Sampling**

110 Biofilm carriers from each cage were snap-frozen in an ethanol-dry ice mixture immediately at  
111 sampling, kept frozen in dry ice during transportation and then stored at -80°C. Sidestream biofilms  
112 had a red colour, while a brown colour was observed in the mainstream biofilms (Figure S1,  
113 Supporting information). In addition, a wet weight of 431 mg ± 36 (average ± 95% confidence  
114 interval) was observed for sidestream biofilms, and 296 ± 13 for mainstream biofilms.

115

### 116 **Co-extraction of DNA and RNA**

117 Carriers with biofilms were thawed in RNA later-ICE (Thermo Fisher Scientific, Waltham, MA  
118 USA). The biofilm was removed from the carrier compartments and added to a lysis matrix tube E  
119 (MP biomedical, Santa Ana, CA, USA) with 800 µl of lysis solution of a ZR-duet MiniPrep kit  
120 (Zymo Research). Mechanical disruption of the biofilm was done with a FastPrep-24 5G (MP

121 biomedical) at speed 6 for 40 seconds. Subsequent steps of the DNA-RNA co-extraction were carried  
122 out with the ZR-duet kit according to manufacturer instructions. Ribolock RNase inhibitor (40 U/ $\mu$ l;  
123 Thermo Fisher Scientific) was added to the extracted RNA. DNA and RNA concentration were  
124 measured after extraction using a Qubit 3.0 fluorometer (Thermo Fisher Scientific). Potential traces of  
125 genomic DNA were removed from the RNA extraction with a DNA-free DNA Removal kit (Thermo  
126 Fisher Scientific). cDNA was synthesised with SuperScript VILO MasterMix (Thermo Fisher  
127 Scientific) according to the manufacturer's instructions.

128

## 129 **Sequencing**

130 PCR amplification of the 16S V4 region was done with primers 515'F (Hugerth, *et al.* 2014) and 806R  
131 (Caporaso, *et al.* 2011), using dual indexing of the primers (Kozich, *et al.* 2013). Template DNA (40  
132 ng) or undiluted cDNA (2  $\mu$ l) was amplified in a total volume of 50  $\mu$ l using a Phusion Hot Start II  
133 DNA Polymerase (Thermo Fisher Scientific). The following PCR program was used: activation  
134 (98°C, 30 s); 30 cycles of denaturation (98°C, 10 s), annealing (56°C, 30 s) and elongation (72°C, 15  
135 s); followed by final elongation (72°C, 10 min). PCR products were purified with Ampure XP  
136 (Beckman Coulter, Brea, CA, USA). Purified PCR products were pooled in equimolar amounts.  
137 Sequencing was performed on an Illumina MiSeq using the MiSeq Reagent Kit v3 (Illumina, San  
138 Diego, CA, USA).

139

140 PCR amplification of *nxB*, *hzsB*, and *amoA* was carried out in two steps using Nextera index adapters  
141 (Illumina). Primers nxB169F and nxB638R (Pester, *et al.* 2013) were used for *nxB* amplification,  
142 amplification of *hzsB* was done with the hzsB\_396F and hzsB\_742R primers (Wang, *et al.* 2012), and  
143 primers AmoA1F mod (Stephen, *et al.* 1999) and AmoA2R (Rotthauwe, *et al.* 1997) were used for  
144 *amoA*. The following PCR program was used for all amplicons: activation (98°C, 30 s); 25 cycles of  
145 denaturation (98°C, 10 s), annealing (56°C, 30 s) and elongation (72°C, 45 s); followed by final  
146 elongation (72°C, 5 min). PCR amplicons were then purified, and a second PCR with 8 cycles of

147 amplification was used to attach the index adapters followed by a second purification. Amplicons  
148 were then pooled together in equimolar amounts and sequenced on a MiSeq as described above.

149

## 150 **Statistics and data analysis.**

151 Samples with less than 30,000 reads were excluded prior to analysis. ASVs were generated, using  
152 DADA2 version 1.12 (Callahan, *et al.* 2016). The SILVA 132 database (Quast, *et al.* 2013) was used  
153 for taxonomic classification of the 16S amplicons with IDTAXA (Murali, *et al.* 2018). Data was  
154 analysed in R (R Core Team 2019) using the packages Phyloseq (McMurdie and Holmes 2013) and  
155 Vegan (Oksanen, *et al.* 2019). Raw sequence reads were deposited at the NCBI (Bioproject:  
156 PRJNA552732). See table S1 for individual accession numbers of each sample.

157

158 Reads were normalized by proportion prior to estimation of beta diversity between mainstream and  
159 sidestream in the rDNA, rRNA, *nxB* and *hxB* libraries and for comparisons between the rDNA and  
160 rRNA libraries. Beta diversity was estimated with the abundance-based Bray-Curtis index and the  
161 presence-absence-based Simpson index, which is not sensitive to richness differences, and is a  
162 measure of turnover (Baselga 2010). To estimate differential abundance of ASVs between sidestream  
163 and mainstream, DESeq2 was used (Love, *et al.* 2014) without subsampling before the analysis  
164 (McMurdie and Holmes 2014). A  $p_{(adj)} < 0.01$  value (DESeq2) was used as criterion for statistical  
165 significance. Only samples with both rDNA and rRNA libraries available (mainstream, n=6;  
166 sidestream, n=7) were used for plots of rDNA vs rRNA. Ratios of rRNA:rDNA were estimated after  
167 excluding values of zero in the libraries.

168

## 169 **Fluorescence in situ hybridization (FISH)**

170 FISH was carried out on suspended biomass as previously described (Suarez, *et al.* 2015). The probe  
171 AMX820 (Schmid, *et al.* 2001), labelled with FAM, was used to target *all Brocadia* populations. The

172 probes BAN162 (Schmid, *et al.* 2001), labelled with Cy3, and BFU613 (van de Vossenber, *et al.*  
173 2008), labelled with Cy5, were used to target *Brocadia* subpopulations, as they only partially cover  
174 the *Brocadia* genus, as determined with ARB 6.0.6 (Ludwig, *et al.* 2004) using the SILVA NR 132  
175 SSU *Brocadia* sequences. These probes were applied together with unlabelled competitors (for  
176 Ban162, CGG TAG CCC CAA TTG CTT; for Bfu613, GGA TGC CGT TCT TCC GTT GAG CGG)  
177 to increase probe specificity, as previously reported (Persson, *et al.* 2014, Suarez, *et al.* 2015).

178

## 179 **Results and discussion**

### 180 **Sidestream and mainstream communities**

181 We compared PNA microbial communities exposed to sidestream and mainstream conditions by  
182 sequencing rDNA and rRNA from individual biofilm carriers. Mainstream and sidestream  
183 communities, estimated from both rDNA and rRNA, were significantly different, as shown with the  
184 abundance-based Bray-Curtis index (Adonis  $\beta_{\text{bray}}$ ;  $p < 0.01$ ,  $r^2 = 0.16$ ; Figure 1A). Because beta-  
185 diversity can also exist among rare taxa (Gobet, *et al.* 2012), we also used the presence-absence  
186 Simpson index, which measures species turnover (Baselga 2010). The observed results (Adonis  $\beta_{\text{Sim}}$ ;  
187  $p < 0.01$ ,  $r^2 = 0.32$ ; Figure 1B), suggest that the sidestream and mainstream communities not only  
188 differed significantly in their relative abundance of taxa, but also in their identity. The sidestream and  
189 mainstream communities also diverged from the initial seed communities, indicating temporal  
190 dynamics (Figure S2, Supporting information). Although elucidating the assembly mechanism of  
191 PNA biofilms is beyond the scope of this study, sidestream and mainstream were exposed to different  
192 environmental conditions and subjected to potential immigration from two different water sources,  
193 which would both influence the community composition.



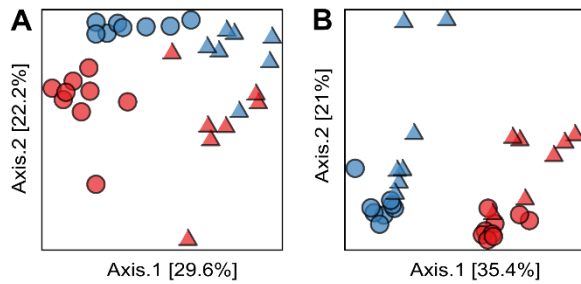

194

195 **Figure 1:** PCoA of rDNA and rRNA libraries, based on the abundance-based Bray-Curtis index (A)

196 and the presence-absence-based Simpson index (B). Red: mainstream, Blue: sidestream. Circles:

197 rDNA, triangles: rRNA.

198

### 199 Comparing rDNA and rRNA libraries

200 The rDNA and rRNA libraries of the mainstream and sidestream communities were different in

201 relative read abundance (Adonis  $\beta_{\text{bray}}$ ;  $p < 0.001$ ,  $r^2 = 0.24$ ; Figure 1A), which could be interpreted as

202 rRNA:rDNA ratios different to one. However, turnover between the rDNA and rRNA libraries was

203 also observed (Adonis  $\beta_{\text{sim}}$ ;  $p < 0.001$ ,  $r^2 = 0.13$ ; Figure 1B), which would imply that different ASVs

204 were detected by sequencing of rDNA and rRNA. ASVs present in the rRNA, but not the rDNA

205 libraries are known as phantom taxa. They could be the result of PCR errors during reverse

206 transcription, but could also arise due to rDNA under-sampling of rare but highly active taxa (Klein,

207 *et al.* 2016). Supporting the latter suggestion, we commonly observed phantom taxa for genera with

208 high rRNA:rDNA values, like *Competibacter*, *Agitococcus*, *Romboutsia*, the AMX *Brocadia* and the

209 AOB *Nitrosomonas* (Figure S3, Supporting information). In addition, among genera with low

210 rRNA:rDNA, like *Denitratisoma*, *Dokdonella* and *UTBCD1* (Figure S3, Supporting information),

211 some ASVs did not have any corresponding rRNA reads. This could signal that a high proportion of

212 these taxa in the biofilms were dormant or dead. Extracellular DNA is commonly observed in

213 biofilms (Dominiak, *et al.* 2011) and could inflate rDNA reads for some taxa (Albertsen, *et al.* 2015).

214

215 Despite the differences, relative read abundances of the rDNA and rRNA libraries over the entire  
216 dataset were positively correlated at the phylum level (Kendall's  $\tau = 0.77$ ,  $p < 0.001$ , Figure 2) as well  
217 as the ASV level (Kendall's  $\tau = 0.59$ ,  $p < 0.001$ ), and also seen by modelling rRNA abundance of  
218 ASVs with beta regression ( $z = 18.0$ ,  $p < 0.001$ , pseudo- $R^2 = 0.44$ ; Figure S4, Supporting information).  
219 Thus, ribosomal relative abundance was generally linked to taxa relative abundance. Nonetheless, it  
220 appears that rRNA:rDNA ratios varied between phyla; for example, low ratios were observed for  
221 *Acidobacteria*, and high ratios were noticed for *Firmicutes* and *Planctomycetes* (Figure 2, S4, table  
222 S2). Such different rRNA:rDNA ratios have been observed before across phyla (Denef, *et al.* 2016,  
223 Steven, *et al.* 2017).

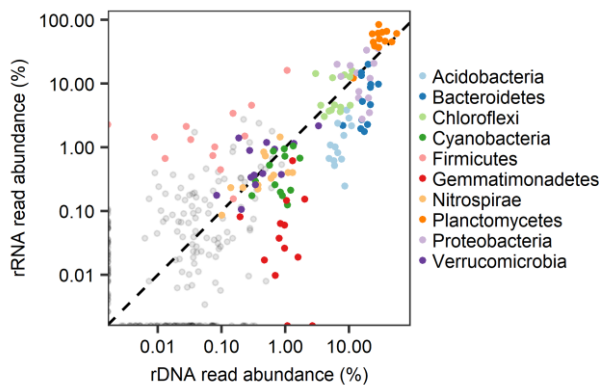

224

225 **Figure 2.** Comparison of rDNA and rRNA of the entire dataset at the phylum-level. Each point  
226 indicates the abundance of an ASV in one MBBR carrier; the black dashed diagonal line indicates  
227 equal rDNA and rRNA abundance. The colours denote the 10 most abundant phyla.

228

229 *Acidobacteria* are considered slow growing bacteria (Ward, *et al.* 2009), and hence it is possible that  
230 their low rRNA:rDNA ratios in fact represent slow growth rates compared to other taxa in the  
231 biofilms. This might be supported by the fact that *Acidobacteria* have between one and two copies of  
232 the 16S RNA gene, since low copy numbers are associated with oligotrophic lifestyles (Klappenbach,  
233 *et al.* 2000, Stevenson and Schmidt 2004). On the other hand, although rRNA:rDNA values larger  
234 than one are frequently used as criteria for activity (Blazewicz, *et al.* 2013), different taxa might differ

235 in their rRNA content during growth or dormancy to the extent that rRNA content and growth rate are  
236 not linked (Blazewicz, *et al.* 2013). Thus, potentially active taxa might be misclassified as dormant  
237 just because their rRNA:rDNA ratio is below one (Steven, *et al.* 2017).

238

239 The disproportionately high read abundances of rRNA at low rDNA abundances for most phyla  
240 (Figure S4) confirm previous similar observations, suggesting higher activity among rare taxa  
241 (Campbell, *et al.* 2011, Jia, *et al.* 2019, Jones and Lennon 2010, Klein, *et al.* 2016, Wilhelm, *et al.*  
242 2014). This phenomenon could perhaps be due to under-sampling (Steven, *et al.* 2017), but higher  
243 growth rate among rare taxa could arise due to intraspecific competition or predation of abundant taxa  
244 (Jousset, *et al.* 2017). In fact, by using metagenomic data, Jia, *et al.* (2019) observed higher  
245 replication rates for taxa at low relative abundances supporting that this is a real phenomenon.

246

#### 247 **Comparing rRNA:rDNA ratios between sidestream and mainstream**

248 We originally expected that the same ASVs present in the relatively different sidestream and  
249 mainstream conditions would have different rRNA:rDNA ratios. For example, in the case of *Brocadia*  
250 we anticipated a higher rRNA:rDNA in the sidestream because the activity in terms of nitrogen  
251 conversion was much higher than in mainstream (Table 1). In addition, the growth rate of anammox  
252 bacteria is affected by temperature (Laureni, *et al.* 2015). But differences in rRNA:rDNA ratios  
253 between the two environments were not observed for any of the 12 ASVs present across all rRNA and  
254 rDNA libraries (Wilcoxon rank sum test,  $p > 0.05$ ; Figure 3).

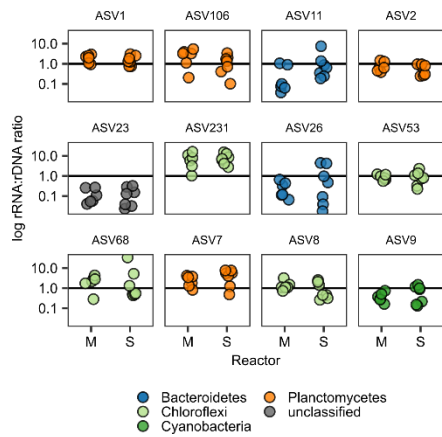

255

256 **Figure 3:** Ratios of rRNA:rDNA for 12 ASVs present in all rDNA and rRNA libraries. Colours  
257 denote phylum classification, M = mainstream and S = sidestream. ASV1 and ASV7 are classified as  
258 the AMX *Brocadia*.

259

260 We conclude that, at least for PNA systems, the rRNA:rDNA ratios are not a direct proxy for  
261 metabolic activity. This would agree with recent studies in soil using stable isotope probing showing  
262 that rRNA:rDNA ratios underestimate active taxa and are a poor predictor of rRNA synthesis (Papp,  
263 *et al.* 2018a, Papp, *et al.* 2018b). For some taxa, ribosomes may not be degraded during slow/no  
264 growth conditions. For *Nitrosomonas*, stable ribosomal content has been observed during inhibition  
265 (Wagner, *et al.* 1995) and preservation of old ribosomes appears to occur in *Thaumarchaeota* (Papp,  
266 *et al.* 2019). Furthermore, presence of rRNA is not necessarily an indication of active rRNA  
267 production, therefore it might be useful to complement measurements of rRNA:rDNA ratios with  
268 other methods such as stable isotope probing (Papp, *et al.* 2018a).

269

### 270 Sidestream and mainstream communities

271 As also reported for other PNA MBBRs (Agrawal, *et al.* 2017, Persson, *et al.* 2017), the dominant  
272 taxa in the biofilms were AMX (Figure 4A), with *Brocadia* being the only AMX genus detected.  
273 Relative read abundance of *Brocadia* rDNA was higher in the sidestream than the mainstream  
274 biofilms (DESeq2;  $p_{(adj)} < 0.01$ ; Figure 4B). Furthermore, potential heterotrophic denitrifying bacteria

275 (HDB) like *Zoogloea* and *Sulfuritalea*, among others, were more abundant in the Mainstream  
 276 (DESeq2;  $p_{(adj)} < 0.01$ , Figure 4B) and were in fact more or less absent in the sidestream biofilms.  
 277 Similarly, Yang, *et al.* (2018) observed a decrease in AMX abundance when a sidestream community  
 278 was exposed to mainstream conditions, also indicating that sidestream conditions favour AMX growth  
 279 relative to other bacteria. The larger fraction of HDB in the mainstream suggests more extensive  
 280 competition for  $\text{NO}_2^-$  between AMX and HDB; in addition, potential nitrogen loops of nitrification,  
 281 anammox, denitrification and DNRA may occur (Speth, *et al.* 2016).

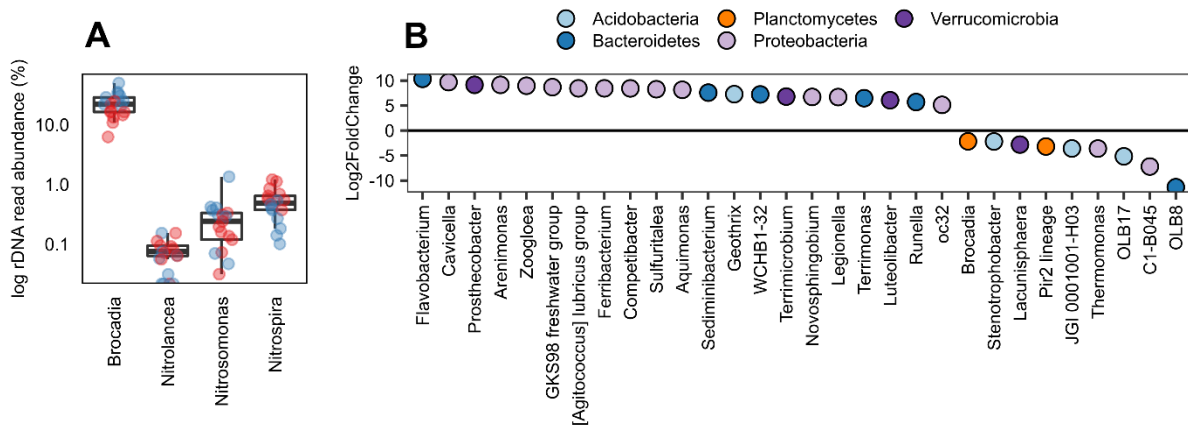

282  
 283 **Figure 4.** Abundance of taxa at the genus level. **A:** rDNA read abundance of AMX (*Brocadia*), AOB  
 284 (*Nitrosomonas*) and NOB (*Nitrospira* and *Nitrolancea*), red: mainstream, blue: sidestream. **B:**  
 285 Log<sub>2</sub>FoldChange (LFC) for rDNA genera with differential abundance between mainstream and  
 286 sidestream biofilms (DESeq2;  $p_{(adj)} < 0.01$ ). Positive LFC corresponds to higher abundance in  
 287 mainstream, and negative LFC corresponds to higher abundance in sidestream; only the top 30 genera  
 288 with the lowest significant  $p_{(adj)}$  are shown.

289

## 290 Microdiversity of nitrogen transforming bacteria

291 Several anammox populations coexisted in the biofilms as assessed by rDNA sequencing (Figure S5-  
 292 S7, Supporting information). An example of the microdiversity within *Brocadia* can be observed in  
 293 Figure 5A, where a combination of different FISH probes was used to visualize three different  
 294 *Brocadia* subpopulations. By sequencing the *hzsB* gene, 119 ASVs within *Brocadia* were detected

295 (Figure 5B, S8, Supporting information), and turnover between sidestream and mainstream was  
296 demonstrated (Adonis,  $\beta_{sim}$ ,  $r^2=0.57$ ,  $p=0.01$ ). Nonetheless, a single ASV was dominant in both  
297 sidestream and mainstream (Figure 5B, S8, Supporting information), and represented  $77 \pm 3\%$  of the  
298 total *hzsB* reads (Figure 5C). As hydrazine synthase (HZS) is a key enzyme for the anammox process,  
299 this suggests that this strain was responsible for the bulk anaerobic oxidation of ammonium in both  
300 the sidestream and the mainstream, in spite of the different environmental conditions in the reactors.

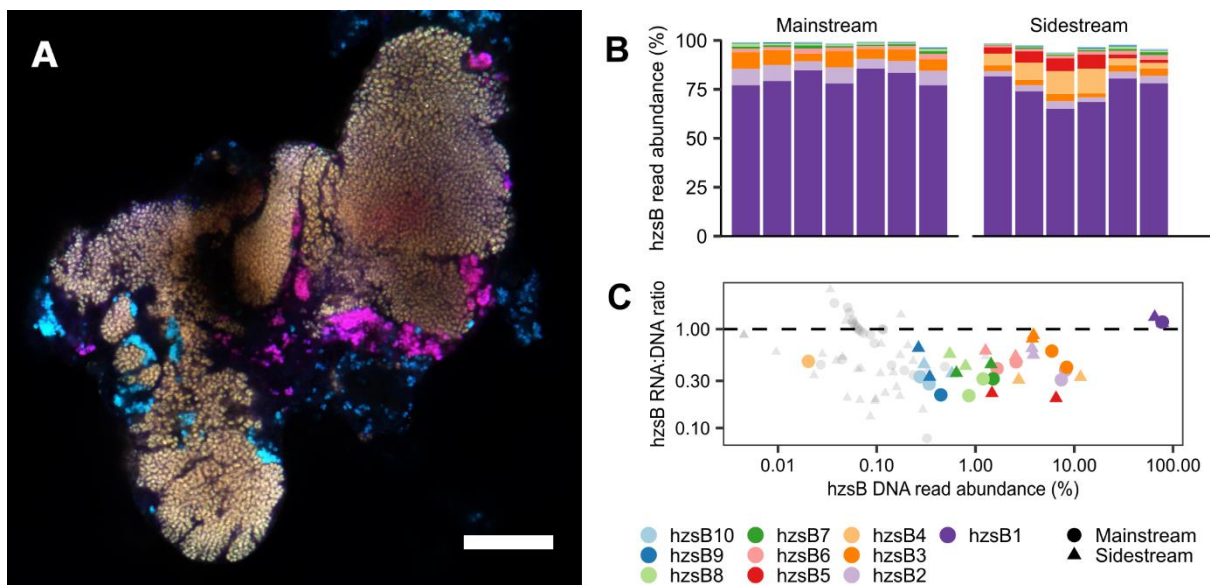

301  
302 **Figure 5A:** Multiple *Brocadia* populations (sidestream) targeted with the FISH probes AMX820  
303 (Blue), BFU613 (Red) and Ban162 (Green); overlap among probes results in additional colours: Cyan  
304 (AMX820 and Ban162), Magenta: (AMX820, BFU613), White: (AMX820, Ban162 and BFU613). **B:**  
305 DNA read abundance of the top 10 *hzsB* ASVs; each colour represents a unique ASV; each bar  
306 represents a biofilm sample. **C:** RNA:DNA ratios for the top 10 *hzsB* ASVs (n=4). Same colour  
307 coding as in B.

308  
309 Using rDNA, several *Nitrospira* and *Nitrosomonas* ASVs were observed (Figure S6, S7, Supporting  
310 information). Likewise, using the key enzymes *nxB* and *amoA* we also observed multiple *Nitrospira*  
311 ASVs (Figure 6, S9, Supporting information) and *Nitrosomonas* ASVs (Figure S10, Supporting  
312 information), respectively. Turnover of *Nitrospira* communities in sidestream and mainstream was

313 observed as assessed with *nxB* (Adonis,  $\beta_{sim}$ ,  $p=0.004$ ,  $r^2=0.39$ ), while for *amoA*, low PCR yield in  
314 sidestream samples prevented comparison of sidestream and mainstream. In microbial communities  
315 the coexistence of closely related taxa is often reported (Goldford, *et al.* 2018). For example, for  
316 *Nitrospira*, which is commonly present in wastewater (Daims, *et al.* 2001), multiple populations can  
317 coexist in activated sludge (Gruber-Dorninger, *et al.* 2014). Coexistence of multiple AMX  
318 populations has also been reported in PNA systems (Bhattacharjee, *et al.* 2017, Lauren, *et al.* 2019,  
319 Persson, *et al.* 2014). *Nitrospira* is a heterogeneous group, which not only represents a nitrite  
320 oxidising potential, but also contains populations capable of using a myriad of electron donors and -  
321 acceptors (Daims, *et al.* 2015, Koch, *et al.* 2015, van Kessel, *et al.* 2015) and the same has also been  
322 shown for AMX (Hu, *et al.* 2019, Kartal, *et al.* 2007, Strous, *et al.* 2006, van de Vossenberg, *et al.*  
323 2008) and AOB (Bock, *et al.* 1995, Schmidt, *et al.* 2004). Thus, the coexistence of different *Brocadia*,  
324 *Nitrosomonas* and *Nitrospira* ASVs, observed in this study, could be a general phenomenon,  
325 explained by ecotypes within the AMX, AOB and the NOB utilizing different metabolic pathways  
326 and playing various ecological roles. The roles of the less abundant AMX in the PNA biofilms are yet  
327 unclear, but read abundance of *hzsB* mRNA (Figure 5C) suggests that their contribution to the  
328 anammox process might have been minor.

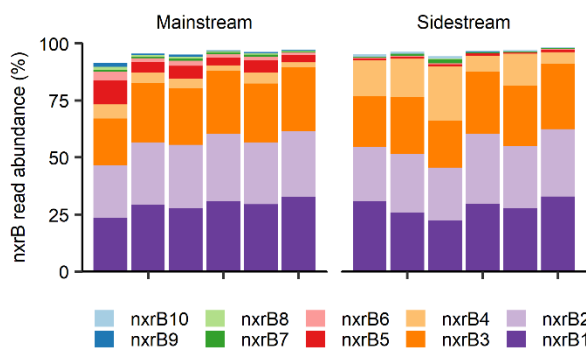

329

330 **Figure 6:** Read abundance of the top 10 *nxB* ASVs.

331

332 The dominant *hzsB* ASV had an identical sequence to *B. sapporoensis*, which is frequently observed  
333 in PNA bioreactors (Lotti, *et al.* 2015b, Persson, *et al.* 2014) and is considered relatively fast growing

334 (Lotti, *et al.* 2015a). It has a maximum specific anammox activity at 37°C (Narita, *et al.* 2017), which,  
335 together with other factors like nitrogen load and partial nitrification rate, would explain the lower  
336 nitrogen removal rates observed in the mainstream compared with the sidestream MBBR. A  
337 considerable decrease of anammox rates with decreasing temperature has often been described in  
338 PNA reactors (Gilbert, *et al.* 2014, Laureni, *et al.* 2016, Lotti, *et al.* 2015b). Interestingly, no  
339 particular cold-tolerated AMX have so far been detected, instead AMX within *Brocadia* are  
340 commonly reported in mainstream reactors. This study suggests that *B. sapporoensis*, can in fact be  
341 competitive relative to other AMX taxa at both sidestream and mainstream conditions. One possible  
342 explanation for such a phenomenon can be mechanisms of adaptation, where temperature changes can  
343 result in changes in membrane composition (Rattray, *et al.* 2010) and protein expression (Lin, *et al.*  
344 2018). Alternatively, there could be multiple closely related populations with identical *hzsB* and  
345 rDNA sequences, but with different accessory genes, and thus metagenomic studies would be needed  
346 to resolve such populations.

347

348 Comammox can occur among lineage II in *Nitrospira* (Daims, *et al.* 2015). The majority of *Nitrospira*  
349 in this study were from lineage I (Figure S9, Supporting information) and thus the comammox  
350 process was likely not important for the nitrogen transformations in the biofilm. Inhibition of NOB is  
351 critical for the function of PNA, and several strategies have been proposed for NOB suppression  
352 including, but not limited to, DO limitation, intermittent aeration and exposure to free nitrous acid  
353 (Malovanyy, *et al.* 2015, Pérez, *et al.* 2014, Wang, *et al.* 2016). However, the observed NOB diversity  
354 within *Nitrospira* could impact reactor performance, because microbial diversity might lead to  
355 functional redundancy (Allison and Martiny 2008). As NOB in any PNA reactor likely consist of  
356 multiple coexisting populations, operational strategies to reduce nitrite oxidation based on knowledge  
357 gained from pure cultures or enrichments may not be adequate. In fact, the inhibition of a dominant  
358 NOB population, may well lead to the succession of another dominant population. Future studies,  
359 combining well-defined reactor experiments with high resolution genomics would gain further



360 insights in how microdiversity of key guilds, as observed here, affects turnover of substrates and  
361 thereby reactor performance

362

### 363 **Funding**

364 This work was supported by FORMAS [245-2014-1528, 942-2015-683 and 2018-01423], Wilhelm  
365 och Martina Lundgrens vetenskapsfond and Adlerbertska forskningsstiftelsen.

### 366 **Acknowledgements**

367 The authors acknowledge the Genomics core facility at the University of Gothenburg, the Centre for  
368 Cellular Imaging at the University of Gothenburg and the National Microscopy Infrastructure, NMI  
369 (VR-RFI 2016-00968), for providing support and use of their equipment, and the colleagues at the  
370 Sjölanda WWTP, for monitoring the pilot reactors.

371

### 372 **References**

- 373 Agrawal S, Karst Søren M, Gilbert Eva M *et al.* The role of inoculum and reactor configuration for  
374 microbial community composition and dynamics in mainstream partial nitrification anammox  
375 reactors. *MicrobiologyOpen* 2017;**6**: e00456.
- 376 Albertsen M, Karst SM, Ziegler AS *et al.* Back to Basics – The Influence of DNA Extraction and  
377 Primer Choice on Phylogenetic Analysis of Activated Sludge Communities. *PLoS ONE*  
378 2015;**10**: e0132783.
- 379 Allison SD, Martiny JBH. Resistance, resilience, and redundancy in microbial communities. *Proc*  
380 *Natl Acad Sci USA* 2008;**105**: 11512-9.
- 381 Baselga A. Partitioning the turnover and nestedness components of beta diversity. *Glob Ecol*  
382 *Biogeogr* 2010;**19**: 134-43.
- 383 Bhattacharjee AS, Wu S, Lawson CE *et al.* Whole-Community Metagenomics in Two Different  
384 Anammox Configurations: Process Performance and Community Structure. *Environ Sci*  
385 *Technol* 2017;**51**: 4317-27.
- 386 Blazewicz SJ, Barnard RL, Daly RA *et al.* Evaluating rRNA as an indicator of microbial activity in  
387 environmental communities: limitations and uses. *ISME J* 2013;**7**: 2061-8.
- 388 Bock E, Schmidt I, Stüven R *et al.* Nitrogen loss caused by denitrifying Nitrosomonas cells using  
389 ammonium or hydrogen as electron donors and nitrite as electron acceptor. *Arch Microbiol*  
390 1995;**163**: 16-20.
- 391 Callahan BJ, McMurdie PJ, Holmes SP. Exact sequence variants should replace operational  
392 taxonomic units in marker-gene data analysis. *ISME J* 2017;**11**: 2639-43.
- 393 Callahan BJ, McMurdie PJ, Rosen MJ *et al.* DADA2: High-resolution sample inference from Illumina  
394 amplicon data. *Nat Meth* 2016;**13**: 581-3.
- 395 Campbell BJ, Yu L, Heidelberg JF *et al.* Activity of abundant and rare bacteria in a coastal ocean.  
396 *Proc Natl Acad Sci USA* 2011;**108**: 12776-81.

- 397 Cao Y, van Loosdrecht MCM, Daigger GT. Mainstream partial nitrification–anammox in municipal  
398 wastewater treatment: status, bottlenecks, and further studies. *Appl Microbiol Biotechnol*  
399 2017;**101**: 1365-83.
- 400 Caporaso JG, Lauber CL, Walters WA *et al.* Global patterns of 16S rRNA diversity at a depth of  
401 millions of sequences per sample. *Proc Natl Acad Sci USA* 2011;**108**: 4516-22.
- 402 Daims H, Lebedeva EV, Pjevac P *et al.* Complete nitrification by *Nitrospira* bacteria. *Nature*  
403 2015;**528**: 504-9.
- 404 Daims H, Nielsen JL, Nielsen PH *et al.* In Situ Characterization of Nitrospira-Like Nitrite-Oxidizing  
405 Bacteria Active in Wastewater Treatment Plants. *Appl Environ Microbiol* 2001;**67**: 5273-84.
- 406 Deneff VJ, Fujimoto M, Berry MA *et al.* Seasonal Succession Leads to Habitat-Dependent  
407 Differentiation in Ribosomal RNA:DNA Ratios among Freshwater Lake Bacteria. *Front*  
408 *Microbiol* 2016;**7**: 606.
- 409 Deutscher MP. Degradation of Stable RNA in Bacteria. *J Biol Chem* 2003;**278**: 45041-4.
- 410 Dominiak DM, Nielsen JL, Nielsen PH. Extracellular DNA is abundant and important for  
411 microcolony strength in mixed microbial biofilms. *Environ Microbiol* 2011;**13**: 710-21.
- 412 Erisman JW, Galloway JN, Dise NB *et al.* *Nitrogen : too much of a vital resource : Science Brief.*  
413 WWF science brief NL. Zeist, The Netherlands: WWF Netherlands, 2015.
- 414 García-García N, Tamames J, Linz AM *et al.* Microdiversity ensures the maintenance of functional  
415 microbial communities under changing environmental conditions. *ISME J* 2019;**13**: 2969-83.
- 416 Gilbert EM, Agrawal S, Karst SM *et al.* Low Temperature Partial Nitrification/Anammox in a Moving  
417 Bed Biofilm Reactor Treating Low Strength Wastewater. *Environ Sci Technol* 2014;**48**: 8784-  
418 92.
- 419 Gobet A, Böer SI, Huse SM *et al.* Diversity and dynamics of rare and of resident bacterial populations  
420 in coastal sands. *ISME J* 2012;**6**: 542-53.
- 421 Goldford JE, Lu N, Bajić D *et al.* Emergent simplicity in microbial community assembly. *Science*  
422 2018;**361**: 469-74.
- 423 Gonzalez-Martinez A, Rodriguez-Sanchez A, Garcia-Ruiz MJ *et al.* Performance and bacterial  
424 community dynamics of a CANON bioreactor acclimated from high to low operational  
425 temperatures. *Chem Eng J* 2016;**287**: 557-67.
- 426 Gruber-Dorninger C, Pester M, Kitzinger K *et al.* Functionally relevant diversity of closely related  
427 *Nitrospira* in activated sludge. *ISME J* 2014;**9**: 643-55.
- 428 Gustavsson DJI, Suarez C, Wilén B-M *et al.* Long-term stability of partial nitrification-anammox for  
429 treatment of municipal wastewater in a moving bed biofilm reactor pilot system. *Sci Total*  
430 *Environ* 2020;**714**: 136342.
- 431 Hanner N, Aspegren H, Nyberg U *et al.* Upgrading the Sjölanda WWTP according to a novel process  
432 concept. *Water Sci Technol* 2003;**47**: 1-7.
- 433 Hu Z, Wessels HJCT, van Alen T *et al.* Nitric oxide-dependent anaerobic ammonium oxidation.  
434 *Nature Comm* 2019;**10**: 1244.
- 435 Hugerth LW, Wefer HA, Lundin S *et al.* DegePrime, a Program for Degenerate Primer Design for  
436 Broad-Taxonomic-Range PCR in Microbial Ecology Studies. *Appl Environ Microbiol*  
437 2014;**80**: 5116-23.
- 438 Jia Y, Leung MHY, Tong X *et al.* Rare Taxa Exhibit Disproportionate Cell-Level Metabolic Activity  
439 in Enriched Anaerobic Digestion Microbial Communities. *mSystems* 2019;**4**: e00208-18.
- 440 Jones SE, Lennon JT. Dormancy contributes to the maintenance of microbial diversity. *Proc Natl*  
441 *Acad Sci USA* 2010;**107**: 5881-6.
- 442 Jousset A, Bienhold C, Chatzinotas A *et al.* Where less may be more: how the rare biosphere pulls  
443 ecosystems strings. *ISME J* 2017;**11**: 853-62.
- 444 Kartal B, Kuypers MMM, Lavik G *et al.* Anammox bacteria disguised as denitrifiers: nitrate reduction  
445 to dinitrogen gas via nitrite and ammonium. *Environ Microbiol* 2007;**9**: 635-42.
- 446 Kerkhof L, Kemp P. Small ribosomal RNA content in marine Proteobacteria during non-steady-state  
447 growth. *FEMS Microbiol Ecol* 1999;**30**: 253-60.
- 448 Klappenbach JA, Dunbar JM, Schmidt TM. rRNA Operon Copy Number Reflects Ecological  
449 Strategies of Bacteria. *Appl Environ Microbiol* 2000;**66**: 1328-33.
- 450 Klein AM, Bohannan BJM, Jaffe DA *et al.* Molecular Evidence for Metabolically Active Bacteria in  
451 the Atmosphere. *Front Microbiol* 2016;**7**: 772.

- 452 Koch H, Lücker S, Albertsen M *et al.* Expanded metabolic versatility of ubiquitous nitrite-oxidizing  
453 bacteria from the genus *Nitrospira*. *Proc Nat Acad Sci* 2015;**112**: 11371-6.
- 454 Kozich JJ, Westcott SL, Baxter NT *et al.* Development of a Dual-Index Sequencing Strategy and  
455 Curation Pipeline for Analyzing Amplicon Sequence Data on the MiSeq Illumina Sequencing  
456 Platform. *Appl Environ Microbiol* 2013;**79**: 5112-20.
- 457 Lackner S, Gilbert EM, Vlaeminck SE *et al.* Full-scale partial nitrification/anammox experiences – An  
458 application survey. *Water Res* 2014;**55**: 292-303.
- 459 Laurenzi M, Falás P, Robin O *et al.* Mainstream partial nitrification and anammox: long-term process  
460 stability and effluent quality at low temperatures. *Water Res* 2016;**101**: 628-39.
- 461 Laurenzi M, Weissbrodt DG, Szivák I *et al.* Activity and growth of anammox biomass on aerobically  
462 pre-treated municipal wastewater. *Water Res* 2015;**80**: 325-36.
- 463 Laurenzi M, Weissbrodt DG, Villez K *et al.* Biomass segregation between biofilm and flocs improves  
464 the control of nitrite-oxidizing bacteria in mainstream partial nitrification and anammox  
465 processes. *Water Res* 2019;**154**: 104-16.
- 466 Lin X, Wang Y, Ma X *et al.* Evidence of differential adaptation to decreased temperature by  
467 anammox bacteria. *Environ Microbiol* 2018;**20**: 3514-28.
- 468 Lotti T, Kleerebezem R, Abelleira-Pereira JM *et al.* Faster through training: The anammox case.  
469 *Water Res* 2015a;**81**: 261-8.
- 470 Lotti T, Kleerebezem R, Hu Z *et al.* Pilot-scale evaluation of anammox-based mainstream nitrogen  
471 removal from municipal wastewater. *Environ Technol* 2015b;**36**: 1167-77.
- 472 Lotti T, Kleerebezem R, Hu Z *et al.* Simultaneous partial nitrification and anammox at low temperature  
473 with granular sludge. *Water Res* 2014;**66**: 111-21.
- 474 Love MI, Huber W, Anders S. Moderated estimation of fold change and dispersion for RNA-seq data  
475 with DESeq2. *Genome Biol* 2014;**15**: 550.
- 476 Ludwig W, Strunk O, Westram R *et al.* ARB: a software environment for sequence data. *Nucleic  
477 Acids Res* 2004;**32**: 1363-71.
- 478 Malovanyy A, Yang J, Trela J *et al.* Combination of upflow anaerobic sludge blanket (UASB) reactor  
479 and partial nitrification/anammox moving bed biofilm reactor (MBBR) for municipal  
480 wastewater treatment. *Bioresour Technol* 2015;**180**: 144-53.
- 481 McInerney JO, McNally A, O'Connell MJ. Why prokaryotes have pangenomes. *Nature Microbiol*  
482 2017;**2**: 17040.
- 483 McMurdie PJ, Holmes S. phyloseq: An R Package for Reproducible Interactive Analysis and  
484 Graphics of Microbiome Census Data. *PLoS ONE* 2013;**8**: e61217.
- 485 McMurdie PJ, Holmes S. Waste Not, Want Not: Why Rarefying Microbiome Data Is Inadmissible.  
486 *PLoS Comput Biol* 2014;**10**: e1003531.
- 487 Moore LR, Rocap G, Chisholm SW. Physiology and molecular phylogeny of coexisting  
488 *Prochlorococcus* ecotypes. *Nature* 1998;**393**: 464-7.
- 489 Murali A, Bhargava A, Wright ES. IDTAXA: a novel approach for accurate taxonomic classification  
490 of microbiome sequences. *Microbiome* 2018;**6**: 140.
- 491 Narita Y, Zhang L, Kimura Z-i *et al.* Enrichment and physiological characterization of an anaerobic  
492 ammonium-oxidizing bacterium 'Candidatus Brocadia sapporoensis'. *Syst Appl Microbiol*  
493 2017;**40**: 448-57.
- 494 Oksanen J, Blanchet FG, Friendly M *et al.* vegan: Community Ecology Package, 2019.
- 495 Papp K, Hungate BA, Schwartz E. Microbial rRNA Synthesis and Growth Compared through  
496 Quantitative Stable Isotope Probing with H218O. *Appl Environ Microbiol* 2018a;**84**: e02441-  
497 17.
- 498 Papp K, Hungate BA, Schwartz E. mRNA, rRNA and DNA quantitative stable isotope probing with  
499 H218O indicates use of old rRNA among soil Thaumarchaeota. *Soil Biol Biochem* 2019;**130**:  
500 159-66.
- 501 Papp K, Mau RL, Hayer M *et al.* Quantitative stable isotope probing with H218O reveals that most  
502 bacterial taxa in soil synthesize new ribosomal RNA. *ISME J* 2018b;**12**: 3043-5.
- 503 Pérez J, Lotti T, Kleerebezem R *et al.* Outcompeting nitrite-oxidizing bacteria in single-stage nitrogen  
504 removal in sewage treatment plants: A model-based study. *Water Res* 2014;**66**: 208-18.

- 505 Persson F, Suarez M, Hermansson M *et al.* Community structure of partial nitrification-anammox  
506 biofilms at decreasing substrate concentrations and low temperature *Microb Biotechnol*  
507 2017;**10**: 761-72.
- 508 Persson F, Sultana R, Suarez M *et al.* Structure and composition of biofilm communities in a moving  
509 bed biofilm reactor for nitrification-anammox at low temperatures. *Bioresour Technol*  
510 2014;**154**: 267-73.
- 511 Pester M, Maixner F, Berry D *et al.* NxrB encoding the beta subunit of nitrite oxidoreductase as  
512 functional and phylogenetic marker for nitrite-oxidizing Nitrospira. *Environ Microbiol*  
513 2013;**16**: 3055-71.
- 514 Quast C, Pruesse E, Yilmaz P *et al.* The SILVA ribosomal RNA gene database project: improved data  
515 processing and web-based tools. *Nucleic Acids Res* 2013;**41**: D590-D6.
- 516 R Core Team. R: A Language and Environment for Statistical Computing. Vienna, Austria: R  
517 Foundation for Statistical Computing, 2019.
- 518 Rattray JE, van de Vossenberg J, Jaeschke A *et al.* Impact of Temperature on Ladderane Lipid  
519 Distribution in Anammox Bacteria. *Appl Environ Microbiol* 2010;**76**: 1596-1603.
- 520 Rothauwe JH, Witzel KP, Liesack W. The ammonia monooxygenase structural gene amoA as a  
521 functional marker: molecular fine-scale analysis of natural ammonia-oxidizing populations.  
522 *Appl Environ Microbiol* 1997;**63**: 4704-12.
- 523 Schaechter M, MaalØe O, Kjeldgaard NO. Dependency on Medium and Temperature of Cell Size and  
524 Chemical Composition during Balanced Growth of Salmonella typhimurium. *Microbiol*  
525 1958;**19**: 592-606.
- 526 Schmid M, Schmitz-Esser S, Jetten M *et al.* 16S-23S rDNA intergenic spacer and 23S rDNA of  
527 anaerobic ammonium-oxidizing bacteria: implications for phylogeny and in situ detection.  
528 *Environ Microbiol* 2001;**3**: 450-9.
- 529 Schmidt I, van Spanning RJM, Jetten MSM. Denitrification and ammonia oxidation by Nitrosomonas  
530 europaea wild-type, and NirK- and NorB-deficient mutants. *Microbiol* 2004;**150**: 4107-14.
- 531 Speth DR, In 't Zandt MH, Guerrero-Cruz S *et al.* Genome-based microbial ecology of anammox  
532 granules in a full-scale wastewater treatment system. *Nat Comm* 2016;**7**: 11172.
- 533 Stephen JR, Chang Y-J, Macnaughton SJ *et al.* Effect of Toxic Metals on Indigenous Soil  $\beta$ -Subgroup  
534 Proteobacterium Ammonia Oxidizer Community Structure and Protection against Toxicity by  
535 Inoculated Metal-Resistant Bacteria. *Appl Environ Microbiol* 1999;**65**: 95-101.
- 536 Steven B, Hesse C, Soghigian J *et al.* Simulated rRNA/DNA Ratios Show Potential To Misclassify  
537 Active Populations as Dormant. *Appl Environ Microbiol* 2017;**83**: e00696-17.
- 538 Stevenson BS, Schmidt TM. Life History Implications of rRNA Gene Copy Number in Escherichia  
539 coli. *Appl Environ Microbiol* 2004;**70**: 6670-7.
- 540 Strous M, Pelletier E, Mangenot S *et al.* Deciphering the evolution and metabolism of an anammox  
541 bacterium from a community genome. *Nature* 2006;**440**: 790-4.
- 542 Suarez C, Persson F, Hermansson M. Predation of nitrification-anammox biofilms used for nitrogen  
543 removal from wastewater. *FEMS Microbiol Ecol* 2015;**91**: fiv124.
- 544 van de Vossenberg JLCM, van Niftrik L, Strous M *et al.* Candidatus 'Brocadia fulgida': an  
545 autofluorescent anaerobic ammonium oxidizing bacterium. *FEMS Microbiol Ecol* 2008;**63**:  
546 46-55.
- 547 van Kessel MAHJ, Speth DR, Albertsen M *et al.* Complete nitrification by a single microorganism.  
548 *Nature* 2015;**528**: 555-9.
- 549 Wagner M, Rath G, Amann R *et al.* In situ Identification of Ammonia-oxidizing Bacteria. *Syst Appl*  
550 *Microbiol* 1995;**18**: 251-64.
- 551 Wang D, Wang Q, Laloo A *et al.* Achieving Stable Nitrification for Mainstream Deammonification by  
552 Combining Free Nitrous Acid-Based Sludge Treatment and Oxygen Limitation. *Sci Rep*  
553 2016;**6**: 25547.
- 554 Wang Y, Zhu G, Harhangi HR *et al.* Co-occurrence and distribution of nitrite-dependent anaerobic  
555 ammonium and methane-oxidizing bacteria in a paddy soil. *FEMS Microbiol Lett* 2012;**336**:  
556 79-88.
- 557 Ward NL, Challacombe JF, Janssen PH *et al.* Three genomes from the phylum Acidobacteria provide  
558 insight into the lifestyles of these microorganisms in soils. *Appl Environ Microbiol* 2009;**75**:  
559 2046-56.

- 560 Wilhelm L, Besemer K, Fasching C *et al.* Rare but active taxa contribute to community dynamics of  
561 benthic biofilms in glacier-fed streams. *Environ Microbiol* 2014;**16**: 2514-24.
- 562 Wu S, Bhattacharjee AS, Weissbrodt DG *et al.* Effect of short term external perturbations on bacterial  
563 ecology and activities in a partial nitritation and anammox reactor. *Bioresour Technol*  
564 2016;**219**: 527-35.
- 565 Yang Y, Zhang L, Cheng J *et al.* Microbial community evolution in partial nitritation/anammox  
566 process: From sidestream to mainstream. *Bioresour Technol* 2018;**251**: 327-33.
